# Supplementary material for: linc00968 inhibits the tumorigenesis and metastasis of lung adenocarcinoma via serving as a ceRNA against miR-9-5p and increasing CPEB3
Source: publisher site journal article supplement (doi:10.18632/aging.103833), 2020-11-05
Supplement: Supplementary file [file aging-v12i22-103833-supplementary-material-SD2.pdf]

## SUPPLEMENTARY TABLES

**Supplementary Table 1. The association between linc00968, miR-9-5p or CPEB3 expression and clinic-pathological factors in patients with LUAD.**

| Clinical parameter     | linc00968 |     | P-value | miR-9-5p |     | P-value | CPEB3 |     | P-value |
|------------------------|-----------|-----|---------|----------|-----|---------|-------|-----|---------|
|                        | High      | Low |         | High     | Low |         | High  | Low |         |
| <b>Age (years)</b>     |           |     | 0.114   |          |     | 0.083   |       |     | 0.042   |
| ≤65                    | 12        | 8   |         | 6        | 14  |         | 9     | 11  |         |
| >65                    | 19        | 17  |         | 22       | 14  |         | 20    | 16  |         |
| <b>Sex</b>             |           |     | 0.318   |          |     | 0.225   |       |     | 0.104   |
| Male                   | 22        | 18  |         | 22       | 18  |         | 23    | 17  |         |
| Female                 | 9         | 7   |         | 6        | 10  |         | 6     | 10  |         |
| <b>Size (cm)</b>       |           |     | 0.31    |          |     | 0.451   |       |     | 0.331   |
| ≥3                     | 17        | 15  |         | 15       | 17  |         | 16    | 16  |         |
| <3                     | 14        | 10  |         | 13       | 11  |         | 13    | 11  |         |
| <b>Differentiation</b> |           |     | 0.094   |          |     | 0.619   |       |     | 0.407   |
| Well, Moderate         | 18        | 13  |         | 15       | 16  |         | 16    | 15  |         |
| Poor                   | 13        | 12  |         | 13       | 12  |         | 13    | 12  |         |
| <b>Metastasis</b>      |           |     | <0.01   |          |     | <0.01   |       |     | <0.01   |
| Yes                    | 10        | 19  |         | 21       | 8   |         | 6     | 23  |         |
| No                     | 21        | 6   |         | 7        | 20  |         | 23    | 4   |         |
| <b>TNM stage</b>       |           |     | <0.01   |          |     | <0.01   |       |     | <0.01   |
| I-II                   | 27        | 7   |         | 8        | 26  |         | 22    | 12  |         |
| III-IV                 | 4         | 18  |         | 20       | 2   |         | 7     | 15  |         |

**Supplementary Table 2. List of primer sequences were used in the qRT-PCR assay.**

| Name     | Primer  | Sequence (5'–3')              |
|----------|---------|-------------------------------|
| U6       | Forward | 5'-CTCGCTTCGGCAGCACA-3'       |
|          | Reverse | 5'-AACGCTTCACGAATTTGCGT-3'    |
| GAPDH    | Forward | 5'-GGAGCGAGATCCCTCCAAAAT-3'   |
|          | Reverse | 5'-GGCTGTTGTCATACTTCTCATGG-3' |
| CPEB3    | Forward | 5'-CTGCAGCATGGAGAGATAG-3'     |
|          | Reverse | 5'-GGGTCAGAATGAACAGAAGAG-3'   |
| miR-9-5p | Forward | 5'-GTGCAGGGTCCGAGGT-3'        |
|          | Reverse | 5'-GCGCTCTTTGGTTATCTAGC-3'    |
